# Supplementary material for: A Xanthohumol-Rich Hop Extract Diminishes Endotoxin-Induced Activation of TLR4 Signaling in Human Peripheral Blood Mononuclear Cells: A Study in Healthy Women
Source: MDPI journal article supplement (doi:10.3390/ijms232012702), 2022-10-21
Supplement: s1 [file s1]

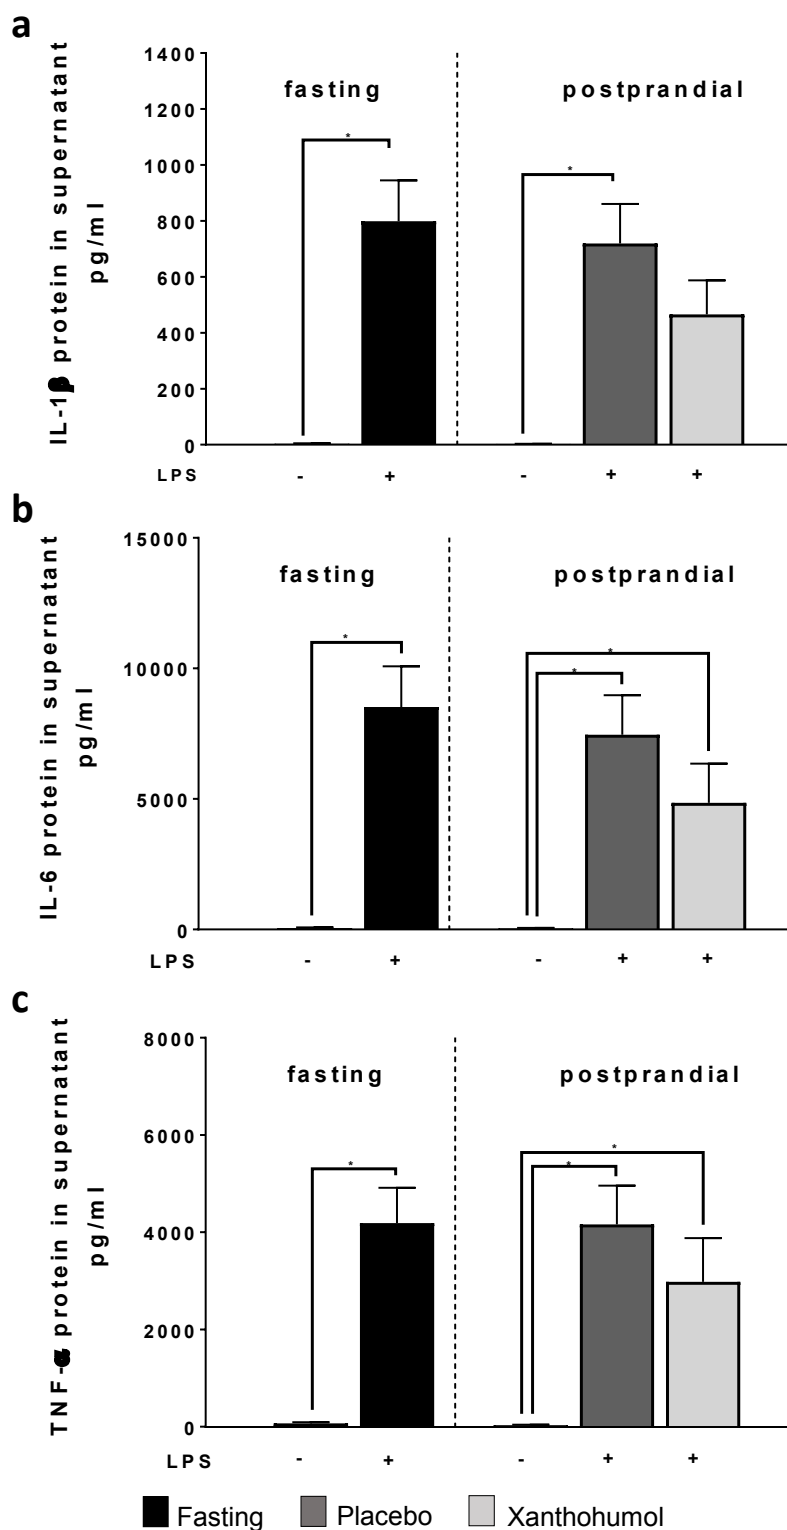

**Figure S1.** Cytokine concentrations in supernatant of LPS-stimulated PBMCs obtained from healthy study participants. Protein concentrations of IL-1 $\beta$  (a), IL-6 (b) and TNF- $\alpha$  (c) in cell culture supernatant of PBMCs stimulated with 0 or 100 ng/ml LPS for 6 h isolated from healthy study participants receiving either a placebo or the study drink containing XN. IL, interleukin; LPS, lipopolysaccharide; PBMC, peripheral blood mononuclear cell; XN, xanthohumol. Data are expressed as means  $\pm$  SEM. \* =  $p < 0.005$ .
